# Supplementary material for: Lack of Induction of RBD-Specific Neutralizing Antibodies despite Repeated Heterologous SARS-CoV-2 Vaccination Leading to Seroconversion and Establishment of T Cell-Specific Memory in a Patient in Remission of Multiple Myeloma
Source: MDPI journal article supplement (doi:10.3390/vaccines10030374), 2022-02-27
Supplement: s1 [file s1]

## **Supplementary Materials:**

### **List of Supplementary Figures and Tables:**

**Figure S1:** Activation-induced marker (AIM) expression on CD4+ and CD8+ T lymphocytes,

**Table S1:** List of antibodies used in the study;

**Table S2:** Absolute cytokine levels in the supernatants of gradient-isolated PBMC incubated with the indicated antigen-specific and polyclonal stimuli;

**Table S3.** Absolute cytokine levels in the supernatants of whole blood incubated with the indicated antigen-specific and polyclonal stimuli;

**Table S4.** Percent activated T cell subsets as determined after incubation with the indicated stimuli;

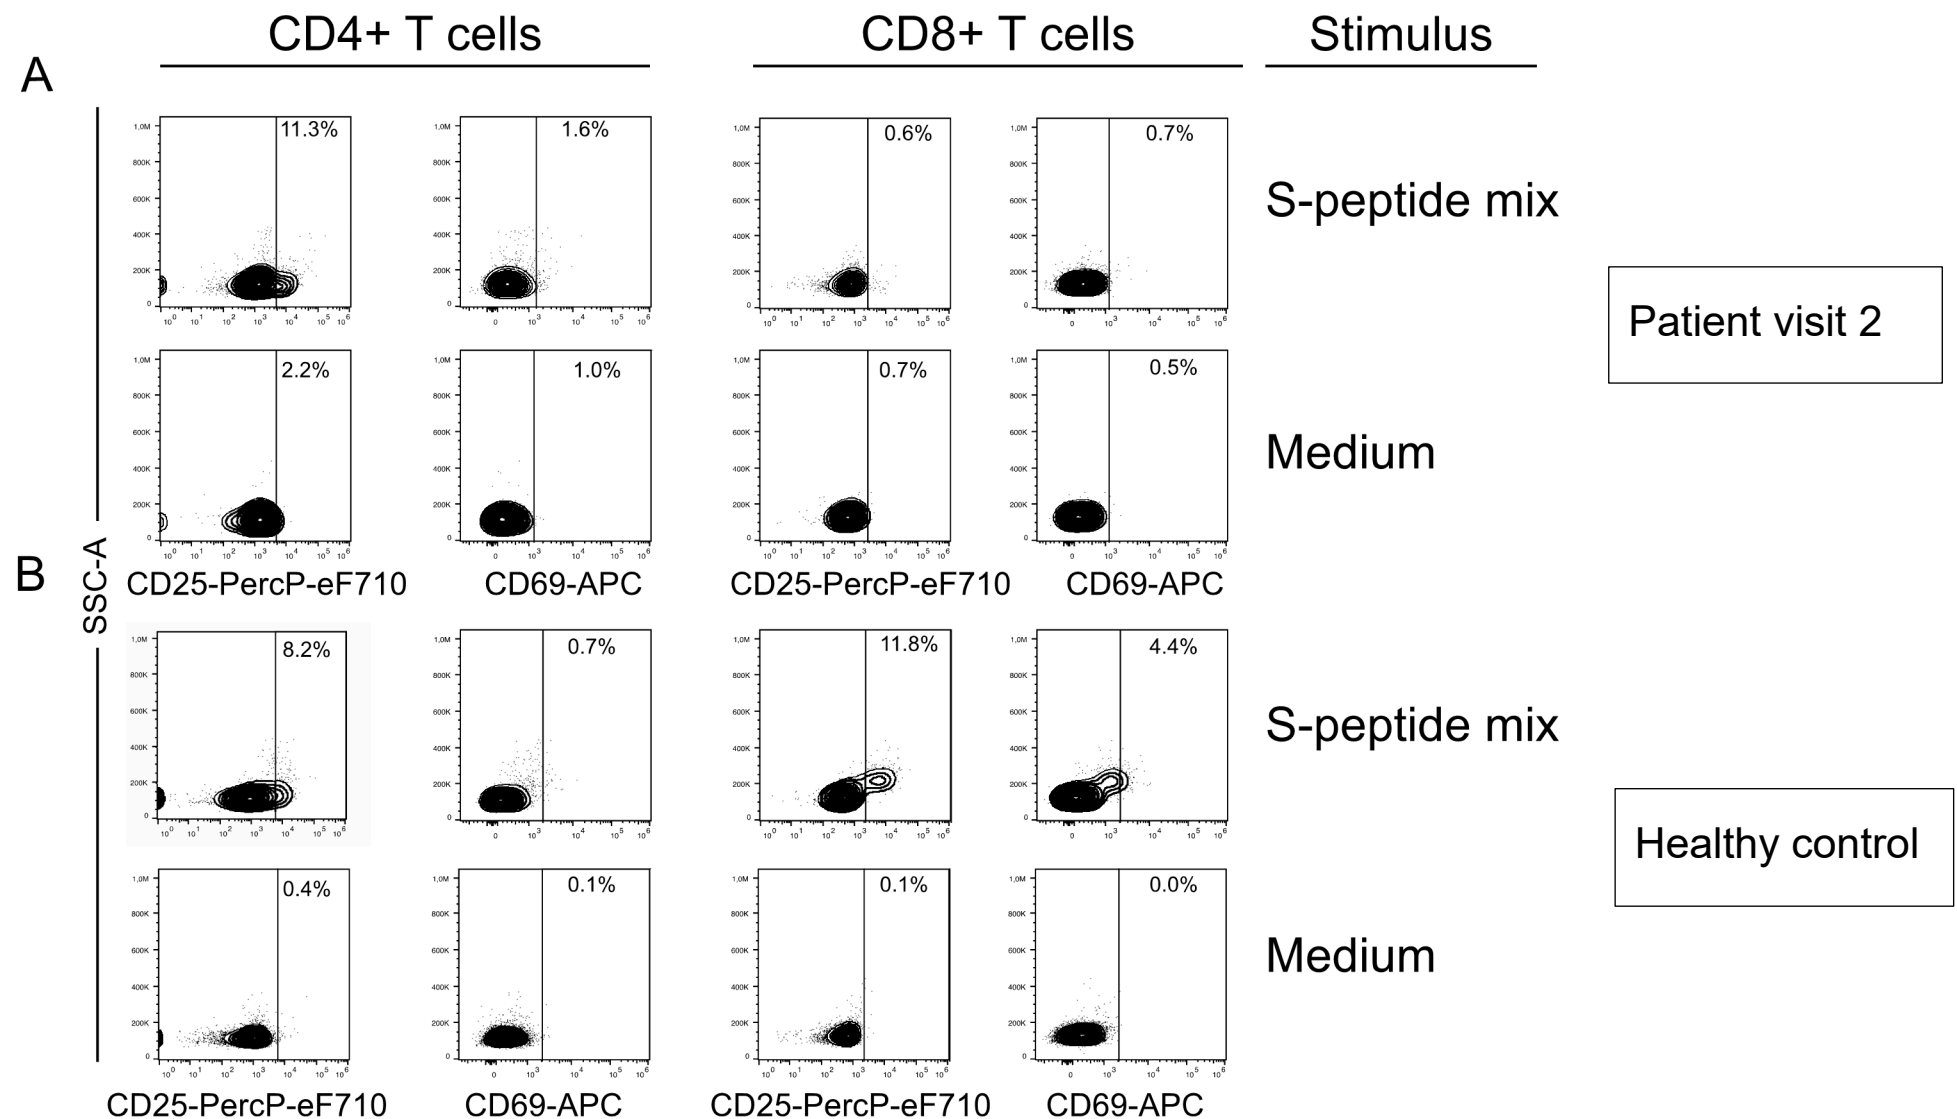

**Figure S1.** Activation-induced marker (AIM) expression on CD4<sup>+</sup> and CD8<sup>+</sup> T lymphocytes. Shown are representative dot plots depicting side scatter (Y-axes) and CD25 or CD69 expression as indicated (X-axes) after incubation with the indicated stimuli. **(A)** Shown are the flow cytometric analyses of the immunocompromised patient at visit 2, **(B)** shown are the flow cytometric analyses of the vaccinated healthy control subject after 44 hours of stimulation. Vertical gates were set according to the staining of cells incubated in medium alone. Numbers indicate percent positive cells within gates.

**Table S1.** List of antibodies used in the study.

| Specificity of | Clone Name | Species     | Fluorophore     | Source                                     |
|----------------|------------|-------------|-----------------|--------------------------------------------|
| CD3            | UCHT1      | Mouse IgG1  | PE-Cy7          | Thermo Fisher Scientific, Waltham, MA, USA |
| CD4            | RPA-T4     | Mouse IgG1  | PE-eFluor610    | Thermo Fisher Scientific                   |
| CD8            | RPA-T8     | Mouse IgG1  | AF700           | Thermo Fisher Scientific                   |
| CD19           | HIB19      | Mouse IgG1  | eFluor506       | Thermo Fisher Scientific                   |
| CD25           | CD25-4E3   | Mouse IgG2b | PerCP-eFluor710 | Thermo Fisher Scientific                   |
| CD69           | FM50       | Mouse IgG1  | APC             | Thermo Fisher Scientific                   |
| CD154          | 24-31      | Mouse IgG1  | FITC            | Thermo Fisher Scientific                   |
| HLA-DR         | LN3        | Mouse IgG2b | eFluor450       | Thermo Fisher Scientific                   |
| CD8            | RPA-T8     | Mouse IgG1  | FITC            | Thermo Fisher Scientific                   |
| sIgK           | TB28-2     | Mouse IgG1  | FITC            | Thermo Fisher Scientific                   |
| TCR a/b        | WT31       | Mouse IgG1  | PE              | Thermo Fisher Scientific                   |
| CD19           | HIB19      | Mouse IgG1  | PE-eFluor610    | Thermo Fisher Scientific                   |
| CD33           | WM-53      | Mouse IgG1  | PerCP-Cy5.5     | Thermo Fisher Scientific                   |
| CD5            | L17F12     | Mouse IgG2a | APC             | Thermo Fisher Scientific                   |
| CD20           | 2H7        | Mouse IgG2b | AF700           | Thermo Fisher Scientific                   |
| CD38           | HIT2       | Mouse IgG1  | APC-eFluor780   | Thermo Fisher Scientific                   |
| CD45           | HI30       | Mouse IgG1  | eFluor506       | Thermo Fisher Scientific                   |

**Table S2.** Absolute cytokine levels in the supernatants of gradient-isolated PBMC incubated with the indicated antigen-specific and polyclonal stimuli.

| Stimulus                                 | Individual                 | TNF- $\alpha$<br>[pg/ml] | TNF- $\alpha$<br>[SI] | IL-2<br>[pg/ml] | IL-2 [SI] | IFN- $\gamma$<br>[pg/ml] | IFN- $\gamma$ [SI] | IL-13<br>[pg/ml] | IL-13 [SI] |
|------------------------------------------|----------------------------|--------------------------|-----------------------|-----------------|-----------|--------------------------|--------------------|------------------|------------|
| Tetanus toxoid                           | Patient visit 1            | 901.6                    | 0.8                   | 1.0             | 1.0       | 153.3                    | 8.7                | 727.6            | 485.1      |
|                                          | Patient visit 2            | 1853.5                   | 2.4                   | 5.1             | 1.3       | 2035.1                   | 223.6              | 2521.6           | 382.1      |
|                                          | Healthy vaccinated control | 2705.6                   | 8.9                   | 8.4             | 0.6       | 7017.4                   | 649.8              | 5488.0           | 1444.2     |
| <i>Staphylococcal</i><br>enterotoxin B   | Patient visit 1            | 3435.5                   | 2.9                   | 1.0             | 1.0       | 23479.1                  | 1326.5             | 8252.8           | 5501.9     |
|                                          | Patient visit 2            | 4637.5                   | 5.9                   | 0               | 0.0       | >32500.0                 | >32500.0           | 7987.2           | 1210.2     |
|                                          | Healthy vaccinated control | 4724.2                   | 15.6                  | 6.2             | 0.4       | 148503.8                 | 13750.4            | 2097.4           | 551.9      |
| Phytohemagglutinin                       | Patient visit 1            | 5221.0                   | 4.4                   | 49.9            | 49.9      | 22732.1                  | 1284.3             | 14340.0          | 9560.0     |
|                                          | Patient visit 2            | 6740.6                   | 8.6                   | 9538.3          | 2384.6    | 17745.4                  | <A1950.0           | 16988.6          | 2574.0     |
|                                          | Healthy vaccinated control | 6368.6                   | 21.0                  | 18293.7         | 1261.6    | 126070.0                 | 11673.1            | 14806.9          | 3896.6     |
| SARS-CoV-2 spike<br>protein peptide mix  | Patient visit 1            | 1072.8                   | 0.9                   | 1.0             | 1.0       | 4.5                      | 0.3                | 3.0              | 2.0        |
|                                          | Patient visit 2            | 774.9                    | 1.0                   | 16.5            | 4.1       | 7.4                      | 0.8                | 29.0             | 4.4        |
|                                          | Healthy vaccinated control | 397.4                    | 1.3                   | 44.4            | 3.1       | 181.5                    | 16.8               | 259.9            | 68.4       |
| SARS-CoV-2 matrix<br>protein peptide mix | Patient visit 1            | 999.1                    | 0.8                   | 1.0             | 1.0       | 4.5                      | 0.3                | 1.0              | 0.7        |
|                                          | Patient visit 2            | 1374.8                   | 1.8                   | 18.5            | 4.6       | < 0                      | <0                 | 9.1              | 1.4        |
|                                          | Healthy vaccinated control | 284.8                    | 0.9                   | 9.4             | 0.6       | 9.1                      | 0.8                | 6.6              | 1.7        |
| Medium                                   | Patient visit 1            | 1177.4                   | 1.0                   | 1.0             | 1.0       | 17.7                     | 1.0                | 1.5              | 1.0        |
|                                          | Patient visit 2            | 783.5                    | 1.0                   | 4.0             | 1.0       | 9.1                      | 1.0                | 6.6              | 1.0        |
|                                          | Healthy vaccinated control | 303.6                    | 1.0                   | 14.5            | 1.0       | 10.8                     | 1.0                | 3.8              | 1.0        |

**Table S3.** Absolute cytokine levels in the supernatants of whole blood incubated with the indicated antigen-specific and polyclonal stimuli

| Stimulus                                    | Individual                 | TNF- $\alpha$<br>[pg/ml] | TNF- $\alpha$ [SI] | IL-2<br>[pg/ml] | IL-2 [SI] | IFN- $\gamma$<br>[pg/ml] | IFN- $\gamma$ [SI] | IL-13<br>[pg/ml] | IL-13 [SI] |
|---------------------------------------------|----------------------------|--------------------------|--------------------|-----------------|-----------|--------------------------|--------------------|------------------|------------|
| Tetanus toxoid                              | Patient visit 2            | 91.8                     | 5.1                | 329.8           | 329.8     | 1195.5                   | 209.7              | 351.7            | 1172.3     |
|                                             | Healthy vaccinated control | 583.3                    | 15.2               | 2981.5          | 2981.5    | 7971.2                   | 514.3              | 705.6            | 106.9      |
| <i>Staphylococcal</i><br>enterotoxin B      | Patient visit 2            | 2082.5                   | 115.1              | 7068.2          | 7068.2    | 14295.5                  | 2508.0             | 2372.2           | 7907.3     |
|                                             | Healthy vaccinated control | 1917.4                   | 49.8               | 6221.1          | 6221.1    | 15122.8                  | 975.7              | 844.9            | 128.0      |
| Phytohemagglu<br>tinin                      | Patient visit 2            | 2546.3                   | 140.7              | 4882.3          | 4882.3    | 8827.2                   | 1548.6             | 3692.5           | 12308.3    |
|                                             | Healthy vaccinated control | 2733.4                   | 71.0               | 6728.2          | 6728.2    | 14251.8                  | 919.5              | 1498.4           | 227.0      |
| SARS-CoV-2<br>spike protein<br>peptide mix  | Patient visit 2            | 124.0                    | 6.9                | 1.0             | 1.0       | 17.1                     | 3.0                | 9.1              | 30.3       |
|                                             | Healthy vaccinated control | 1540.8                   | 40.0               | 51.5            | 51.5      | 6039.2                   | 389.6              | 258.3            | 39.1       |
| SARS-CoV-2<br>matrix protein<br>peptide mix | Patient visit 2            | 25.8                     | 1.4                | 1.0             | 1.0       | 4.0                      | 0.7                | 0.3              | 1.0        |
|                                             | Healthy vaccinated control | 57.1                     | 1.5                | 0.0             | 0.0       | 17.8                     | 1.1                | 11.4             | 1.7        |
| Medium                                      | Patient visit 2            | 18.1                     | 1.0                | 1.0             | 1.0       | 5.7                      | 1.0                | 0.3              | 1.0        |
|                                             | Healthy vaccinated control | 38.5                     | 1.0                | 1.0             | 1.0       | 15.5                     | 1.0                | 6.6              | 1.0        |

**Table S4.** Percent activated T cell subsets as determined after incubation with the indicated stimuli.

| Stimulus                                    | Individual      | CD25 <sup>+</sup><br>CD4 <sup>+</sup><br>T cells [%]<br>(SI) |         | CD69 <sup>+</sup><br>CD4 <sup>+</sup><br>T cells [%]<br>(SI) |         | CD154 <sup>+</sup><br>CD4 <sup>+</sup><br>T cells [%]<br>(SI) |         | HLA-DR <sup>+</sup><br>CD4 <sup>+</sup><br>T cells [%]<br>(SI) |       | CD25 <sup>+</sup><br>CD8 <sup>+</sup><br>T cells [%]<br>(SI) |         | CD69 <sup>+</sup><br>CD8 <sup>+</sup><br>T cells [%]<br>(SI) |         | CD154 <sup>+</sup><br>CD8 <sup>+</sup><br>T cells [%]<br>(SI) |         | HLA-DR <sup>+</sup><br>CD8 <sup>+</sup><br>T cells [%]<br>(SI) |        |
|---------------------------------------------|-----------------|--------------------------------------------------------------|---------|--------------------------------------------------------------|---------|---------------------------------------------------------------|---------|----------------------------------------------------------------|-------|--------------------------------------------------------------|---------|--------------------------------------------------------------|---------|---------------------------------------------------------------|---------|----------------------------------------------------------------|--------|
|                                             |                 |                                                              |         |                                                              |         |                                                               |         |                                                                |       |                                                              |         |                                                              |         |                                                               |         |                                                                |        |
| Tetanus toxoid                              | Visit 2         | 22.3                                                         | (10.2)  | 6.4                                                          | (6.7)   | 16.9                                                          | (15.4)  | 24.8                                                           | (3.7) | 7.2                                                          | (9.9)   | 2.7                                                          | (5.5)   | 4.0                                                           | (16.7)  | 27.8                                                           | (2.1)  |
|                                             | Healthy control | 8.1                                                          | (23.2)  | 1.9                                                          | (17.5)  | 2.1                                                           | (23.3)  | 11.2                                                           | (3.0) | 3.0                                                          | (25.3)  | 8.6                                                          | (194.5) | 3.2                                                           | (81.8)  | 19.6                                                           | (6.3)  |
| <i>Staphylococcal</i><br>enterotoxin B      | Visit 2         | 36.7                                                         | (16.8)  | 23.9                                                         | (24.9)  | 44.3                                                          | (40.3)  | 33.2                                                           | (4.9) | 18.2                                                         | (25.3)  | 29.4                                                         | (61.3)  | 28.2                                                          | (117.5) | 64.7                                                           | (4.8)  |
|                                             | Healthy control | 16.6                                                         | (47.4)  | 8.9                                                          | (80.9)  | 7.4                                                           | (83.8)  | 17.5                                                           | (4.7) | 13.2                                                         | (110.0) | 12.5                                                         | (284.1) | 1.7                                                           | (43.8)  | 24.3                                                           | (7.9)  |
| Phytohemagglu-<br>tinin                     | Visit 2         | 66.2                                                         | (30.2)  | 66.7                                                         | (69.5)  | 61.8                                                          | (56.2)  | 56.6                                                           | (8.4) | 58.4                                                         | (81.1)  | 50.3                                                         | (104.8) | 28.0                                                          | (116.7) | 76.0                                                           | (5.7)  |
|                                             | Healthy control | 72.2                                                         | (206.3) | 46.5                                                         | (422.7) | 52.5                                                          | (596.6) | 34.1                                                           | (9.2) | 86.9                                                         | (724.2) | 40.1                                                         | (911.4) | 10.8                                                          | (276.9) | 35.8                                                           | (11.6) |
| SARS-CoV-2<br>spike protein<br>peptide mix  | Visit 2         | 11.3                                                         | (5.2)   | 2.0                                                          | (2.1)   | 3.1                                                           | (2.8)   | 11.4                                                           | (1.7) | 0.6                                                          | (0.8)   | 0.7                                                          | (1.5)   | 0.4                                                           | (1.7)   | 11.4                                                           | (0.9)  |
|                                             | Healthy control | 8.2                                                          | (23.5)  | 0.7                                                          | (6.4)   | 0.7                                                           | (8.0)   | 10.6                                                           | (2.9) | 11.8                                                         | (98.3)  | 4.4                                                          | (99.8)  | 0.4                                                           | (10.5)  | 12.6                                                           | (4.1)  |
| SARS-CoV-2<br>matrix protein<br>peptide mix | Visit 2         | 3.5                                                          | (1.6)   | 0.7                                                          | (0.7)   | 0.5                                                           | (0.5)   | 8.3                                                            | (1.2) | 0.2                                                          | (0.2)   | 0.2                                                          | (0.3)   | 0.0                                                           | (0.0)   | 9.8                                                            | (0.7)  |
|                                             | Healthy control | 2.4                                                          | (6.9)   | 0.1                                                          | (0.9)   | 0.1                                                           | (1.1)   | 5.1                                                            | (1.4) | 0.3                                                          | (2.4)   | 0.3                                                          | (6.6)   | 0.0                                                           | (1.1)   | 4.6                                                            | (1.5)  |
| Medium                                      | Visit 2         | 2.2                                                          | (1.0)   | 1.0                                                          | (1.0)   | 1.1                                                           | (1.0)   | 6.7                                                            | (1.0) | 0.7                                                          | (1.0)   | 0.5                                                          | (1.0)   | 0.2                                                           | (1.0)   | 13.4                                                           | (1.0)  |
|                                             | Healthy control | 0.4                                                          | (1.0)   | 0.1                                                          | (1.0)   | 0.1                                                           | (1.0)   | 3.7                                                            | (1.0) | 0.1                                                          | (1.0)   | 0.0                                                          | (1.0)   | 0.0                                                           | (1.0)   | 3.1                                                            | (1.0)  |
